# Supplementary material
Source: HighWire-hosted journal article supplement (https://jnm.snmjournals.org/highwire/filestream/105310/field_highwire_adjunct_files/0/262709_Supplemental_Data.pdf)
Supplement: 262709_Supplemental_Data.pdf [file 262709_Supplemental_Data.pdf]

**SUPPLEMENTAL TABLE 1.** Scan parameters for  $^{11}\text{C}$ -UCB-J PET imaging.

| Age (months) | Genotype | Sample size (n) | Molar activity (GBq/ $\mu\text{mol}$ ) | Injected dose (MBq) | Injected mass ( $\mu\text{g/kg}$ ) | Body weight (g) |
|--------------|----------|-----------------|----------------------------------------|---------------------|------------------------------------|-----------------|
| 3            | WT       | 16              | 77 (15.3)                              | 4.8 (1.0)           | 1.31 (0.21)                        | 28.1 (2.8)      |
|              | HET      | 16              | 77 (15.3)                              | 4.6 (0.9)           | 1.28 (0.21)                        | 27.6 (1.8)      |
| 7            | WT       | 17              | 107 (40.3)                             | 5.9 (1.4)           | 1.17 (0.22)                        | 31.1 (2.3)      |
|              | HET      | 18              | 108 (36.7)                             | 5.8 (1.4)           | 1.15 (0.15)                        | 29.8 (1.5)      |
| 10           | WT       | 15              | 102 (43.8)                             | 5.9 (1.5)           | 1.07 (0.26)                        | 31.6 (1.8)      |
|              | HET      | 16              | 111 (50.9)                             | 5.9 (1.5)           | 1.07 (0.30)                        | 29.0 (1.7)      |
| 16           | WT       | 16              | 95 (2.9)                               | 5.9 (0.8)           | 1.10 (0.20)                        | 32.0 (2.9)      |
|              | HET      | 14              | 95 (10.9)                              | 4.8 (0.9)           | 1.07 (0.21)                        | 26.1 (1.6)      |

Values are expressed as mean (SD). WT = wild-type, HET = heterozygous.

**SUPPLEMENTAL TABLE 2.** Linear mixed-model statistical analysis of the longitudinal  $^{11}\text{C}$ -UCB-J  $V_{\text{T(DIF)}}$  PET study.

| Brain region | Genotype effect                      |          | Time effect                          |          | Genotype*Time effect                 |          |
|--------------|--------------------------------------|----------|--------------------------------------|----------|--------------------------------------|----------|
|              | <i>F</i> ( <i>DFn</i> , <i>DFd</i> ) | <i>P</i> | <i>F</i> ( <i>DFn</i> , <i>DFd</i> ) | <i>P</i> | <i>F</i> ( <i>DFn</i> , <i>DFd</i> ) | <i>P</i> |
| Striatum     | 32.53 (1,34)                         | < 0.0001 | 8.17 (2, 52)                         | 0.0008   | 1.73 (2, 52)                         | 0.1873   |
| Motor cortex | 33.39 (1,34)                         | < 0.0001 | 9.65 (2, 52)                         | 0.0003   | 3.01 (2, 52)                         | 0.0573   |
| Hippocampus  | 39.83 (1,34)                         | < 0.0001 | 8.54 (2, 52)                         | 0.0006   | 2.59 (2, 52)                         | 0.0847   |
| Thalamus     | 44.40 (1,34)                         | < 0.0001 | 7.94 (2, 52)                         | 0.0010   | 1.58 (2, 52)                         | 0.2153   |

**SUPPLEMENTAL TABLE 3.**  $^{11}\text{C}$ -UCB-J  $V_{\text{T (IDIF)}}$  values for WT and heterozygous animals imaged at each time point. The table includes Cohen's effect size ( $d$ ) for each genotypic comparison.

| Age | Genotype | $^{11}\text{C}$ -UCB-J $V_{\text{T (IDIF)}}$ (mL/cm <sup>3</sup> ) |                 |                 |                 |
|-----|----------|--------------------------------------------------------------------|-----------------|-----------------|-----------------|
|     |          | Striatum                                                           | Motor Cortex    | Hippocampus     | Thalamus        |
| 3M  | WT       | 5.89 (0.68)                                                        | 6.38 (0.82)     | 6.49 (0.85)     | 7.13 (0.86)     |
|     | HET      | 5.68 (0.45)                                                        | 6.04 (0.50)     | 6.18 (0.56)     | 6.76 (0.56)     |
|     |          | $d = 0.36$                                                         | $d = 0.50$      | $d = 0.43$      | $d = 0.51$      |
| 7M  | WT       | 5.48 (0.62)                                                        | 5.86 (0.66)     | 6.14 (0.67)     | 6.67 (0.70)     |
|     | HET      | 4.76 (0.68)**                                                      | 5.05 (0.76)***  | 5.35 (0.75)**   | 5.68 (0.83)***  |
|     |          | $d = 1.10$                                                         | $d = 1.13$      | $d = 1.11$      | $d = 1.29$      |
| 10M | WT       | 5.21 (0.45)                                                        | 5.47 (0.44)     | 5.84 (0.46)     | 6.32 (0.55)     |
|     | HET      | 4.68 (0.54)**                                                      | 4.91 (0.52)***  | 5.21 (0.53)**   | 5.55 (0.62)***  |
|     |          | $d = 1.06$                                                         | $d = 1.16$      | $d = 1.27$      | $d = 1.31$      |
| 16M | WT       | 5.13 (0.51)                                                        | 5.51 (0.57)     | 5.79 (0.57)     | 6.23 (0.63)     |
|     | HET      | 4.10 (0.38)****                                                    | 4.28 (0.45)**** | 4.52 (0.44)**** | 4.87 (0.49)**** |
|     |          | $d = 2.29$                                                         | $d = 2.39$      | $d = 2.49$      | $d = 2.41$      |

Values are reported as mean (SD). WT = wild-type, HET = heterozygous, M = months.

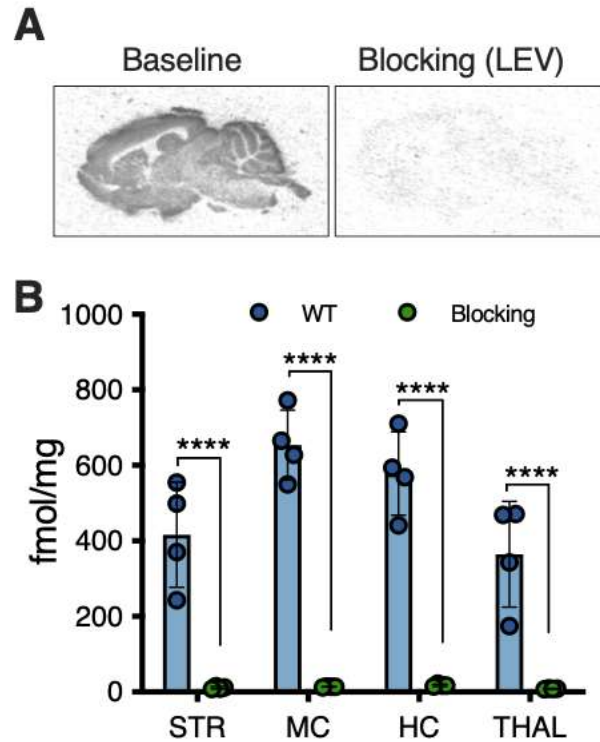

**SUPPLEMENTAL FIGURE 1.** (A) Representative total binding autoradiograms of  $^3\text{H}$ -UCB-J during with or without co-incubation with levetiracetam (LEV, 1 mM) in the same animal. (B)  $^3\text{H}$ -UCB-J specific binding during baseline and coincubation with LEV.  $n = 4$ . \*\*\*\* $p < 0.0001$ . STR = striatum, MC = motor cortex, HC = hippocampus, and THAL = thalamus.

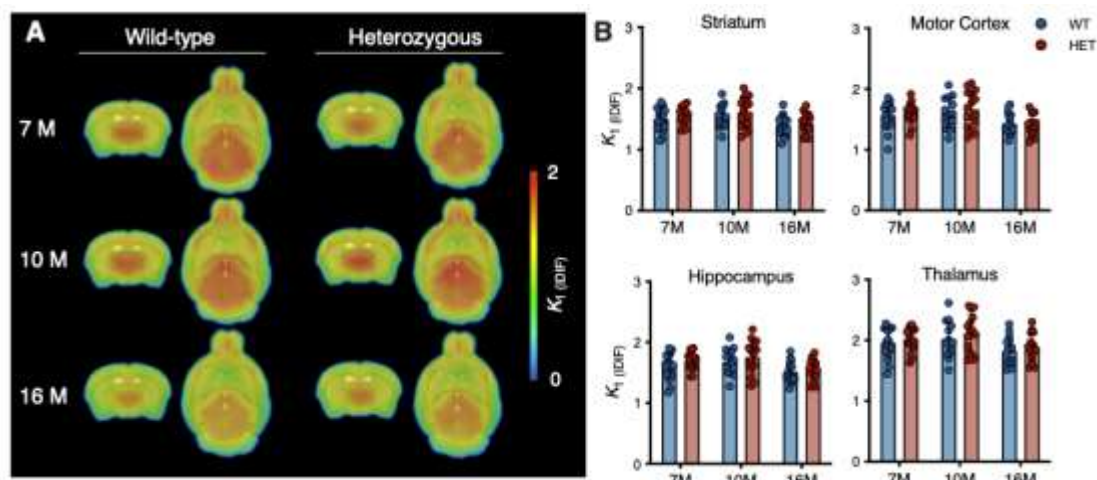

**SUPPLEMENTAL FIGURE 2. The decreased  $^{11}\text{C}$ -UCB-J binding in heterozygous mice is not due to altered  $K_1$  (IDIF).** (A) Mean  $K_1$  (IDIF) maps overlaid on MRI template for anatomical localization. (B) Cerebral  $K_1$  (IDIF) is not altered in heterozygous (HET) mice compared to WT littermates.
